# Supplementary material
Source: publisher figshare collection journal article supplement (https://tandf.figshare.com/articles/dataset/_/24980792)
Supplement: Supplementary file 1 [file 1]

## Sheet: S1
Table S1. Zircon U-Pb dating for representative sample EP-18-02 from the Epo granite
Spot no.	Th232 ppm	U238 ppm	Th/U	207Pb/206Pb	1SE	207Pb/235U	1SE	206Pb/238U	1SE	207Pb/235U Age(Ma)	1SE	206Pb/238U Age(Ma)	1SE
EP-18-02
1	188.53	231.12	0.815723	0.05421	0.00307	0.48739	0.0275	0.06529	0.00153	403	7	408	9
2	113.27	128.69	0.880177	0.05446	0.00394	0.48642	0.03427	0.06501	0.00164	402	6	406	10
3	308.78	623.23	0.495451	0.05543	0.00253	0.50218	0.02276	0.066	0.00131	413	7	412	8
4	169.45	250.71	0.67588	0.05523	0.00155	0.49416	0.01468	0.06526	0.00117	408	8	408	7
5	181.22	262.52	0.690309	0.05629	0.00548	0.50686	0.04789	0.06592	0.00206	416	8	412	12
6	147.66	208.23	0.70912	0.0562	0.00204	0.50834	0.01863	0.06603	0.00121	417	8	412	7
7	124.28	553.04	0.224722	0.05575	0.00226	0.51399	0.02101	0.06742	0.00132	421	7	421	8
8	93.72	326.08	0.287414	0.05556	0.00522	0.51214	0.04659	0.06727	0.00212	420	6	420	13
9	282.82	381.34	0.741648	0.05546	0.00251	0.52452	0.02359	0.0688	0.00134	428	7	429	8
10	172.47	410.83	0.419809	0.05471	0.00502	0.49296	0.0439	0.06581	0.00197	407	6	411	12
11	181.83	911.17	0.199557	0.05501	0.00166	0.50592	0.01562	0.06675	0.00112	416	6	417	7
12	220.9	280.69	0.786989	0.05513	0.00275	0.50095	0.02496	0.06595	0.0012	412	6	412	7
13	175.48	202.01	0.86867	0.05591	0.00173	0.50746	0.01593	0.06586	0.00107	417	11	411	6
14	85.22	207.59	0.410521	0.05531	0.00142	0.50764	0.01335	0.06658	0.00101	417	7	416	6
15	154.95	192.13	0.806485	0.05679	0.00141	0.52052	0.01335	0.06649	0.00101	425	8	415	6
16	135.62	168.42	0.805249	0.05523	0.00147	0.50849	0.01379	0.06679	0.00102	417	9	417	6
17	260.75	239.23	1.08996	0.05465	0.00274	0.50128	0.02478	0.06658	0.00133	413	9	416	8
18	184.52	367.92	0.501522	0.05432	0.00153	0.49304	0.01417	0.06583	0.00104	407	11	411	6
19	272.4	1171.01	0.23262	0.05436	0.00229	0.51241	0.02117	0.06839	0.0012	420	8	426	7
20	241.62	296.46	0.815017	0.05661	0.00177	0.51307	0.01613	0.06573	0.00107	421	11	410	6
21	179.15	676.19	0.26494	0.05373	0.00148	0.48901	0.01382	0.06602	0.00104	404	7	412	6
22	136.3	206.6	0.659729	0.05409	0.00156	0.49096	0.01446	0.06583	0.00105	406	7	411	6
23	136.87	282.39	0.484684	0.05435	0.00206	0.49631	0.0185	0.06625	0.00111	409	7	414	7

## Sheet: S2
Table S2. Zircon trace elements for representative sample EP-18-02 from the Epo granite
Spot No.	EP18-2-1	EP18-2-2	EP18-2-3	EP18-2-4	EP18-2-5	EP18-2-6	EP18-2-7	EP18-2-8	EP18-2-9	EP18-2-10	EP18-2-11	EP18-2-12	EP18-2-13	EP18-2-14	EP18-2-15	EP18-2-16	EP18-2-17	EP18-2-18	EP18-2-19	EP18-2-20	EP18-2-21	EP18-2-22	EP18-2-23
La(ppm)	0.01	0.001	0.001	0.01	0.074	0.01	0.01	0.014	2.68	0.029	0.02	0.02	0.01	0.02	0.01	0.316	0.028	0.039	0.01	0.94	0.01	0.01	0.01
Ce(ppm)	13.82	14.85	19.09	7.72	11.91	3.37	4.61	3.63	29.01	13.41	5.42	15.55	21.18	4.29	12.69	13.37	17.72	10.6	7.9	16.07	6.16	9.07	3.91
Pr(ppm)	0.05	0.132	0.047	0.05	0.04	0.033	0.069	0.064	1.07	0.049	0.087	0.072	0.106	0.033	0.057	0.233	0.181	0.043	0.078	0.431	0.038	0.121	0.11
Nd(ppm)	1.07	2.16	1.52	1.29	1.29	0.65	0.98	1.82	7.4	1.36	0.94	1.11	1.64	1.15	1.34	3.67	3.03	1.19	1.42	3.54	0.81	0.91	0.67
Sm(ppm)	2.57	4.6	4.11	3.06	3.81	1.61	2.73	3.79	6.13	3.69	4.08	3.11	3.9	3.88	3.28	7.01	7.24	4.08	5.71	4.35	3.3	3.8	2.01
Eu(ppm)	0.162	0.58	0.077	0.142	0.228	0.159	0.056	0.239	0.417	0.16	0.177	0.175	0.483	0.054	0.321	0.82	0.479	0.211	0.07	0.091	0.092	0.172	0.03
Gd(ppm)	11.53	15.69	13.48	13.44	17.7	14.35	17.08	22.62	20.81	14.33	16.2	15.9	17.42	17.57	15.43	27.44	25.11	14.82	21	15.42	18.08	13.37	16.05
Tb(ppm)	7.53	7.55	8.13	8	8.1	9.78	9.56	11.18	9.68	7.23	10.2	7.04	7.71	9.57	7.36	10.63	10.46	7.31	13.81	8.02	10.05	6.84	9.69
Dy(ppm)	108.99	86.65	99.83	121.11	105.93	148.21	145.5	153.57	115.77	94.59	140.84	90.22	87.88	141.56	84.79	121.11	121.96	97.48	184.68	95.35	138.2	83.55	151.33
Ho(ppm)	42.9	29.78	36.63	50.5	37.98	61.43	60.29	59.76	42.18	36.2	55.29	32.85	32.57	54.61	31.46	43.03	44.06	36.28	73.26	33.03	58.07	30.04	62.81
Er(ppm)	192.25	135.87	173.16	249.14	172.46	317.4	286.69	280.96	186.26	168.02	276.7	146.37	145.61	243.12	133.94	180.83	188.69	159.08	349.32	145.54	292.91	129.63	290.64
Tm(ppm)	47.69	30.42	39.16	60.7	38.23	83.46	71.14	67.63	41.34	40.47	69.3	32.06	30.62	58.88	28.86	38.37	39.8	38.74	85.81	33.49	73.54	28.84	80.15
Yb(ppm)	510.08	293.95	405.48	703.27	384.49	969.69	760.02	733.31	413.25	420.95	774.37	327.29	317.11	572.67	293.57	397.18	399.68	399.95	955.5	330.6	809.58	297.7	872.22
Lu(ppm)	72.97	43.31	61.03	102.24	56.84	147.34	114.41	107.5	60.53	61.4	117.32	47.45	46.85	86.59	42.21	57.53	58.08	56.55	133.81	47.64	121.88	43.02	125.34
Y(ppm)	1120.54	854.71	1020.05	1408.83	1044.57	1699.62	1642.05	1617.6	1113.51	986.37	1601.66	881.23	888.57	1557.04	856.13	1167.73	1206.19	979.85	2021.55	884.89	1610.61	803.51	1745.64
Ti(ppm)	61.88	64.33	34.48	45.31	59.21	40.41	27.73	39.56	31.9	10.24	30.55	20.7	9.64	20.42	26.57	27.08	12.95	14.62	10.14	28.92	4.91	13.7	5.06
Hf(ppm)	13125	8704.78	11494.6	12132.2	11307	13397.5	12576.6	12716.8	10901.7	11693.7	12119.8	11376.2	9885.77	10090	9770.93	8486.45	9737.34	9989.35	11263.7	9910.9	13608.6	9658.56	11699.5
Th(ppm)	188.53	113.27	308.78	169.45	181.22	147.66	124.28	93.72	282.82	172.47	181.83	220.9	175.48	85.22	154.95	135.62	260.75	184.52	272.4	241.62	179.15	136.3	136.87
U(ppm)	231.12	128.69	623.23	250.71	262.52	208.23	553.04	326.08	381.34	410.83	911.17	280.69	202.01	207.59	192.13	168.42	239.23	367.92	1171.01	296.46	676.19	206.6	282.39
Zr(ppm)	567875	478005	501282	498644	528263	513871	496408	495278	538733	511375	497168	513660	519483	457597	500181	495200	431036	501677	494534	486265	458604	451466	435631
Hf(ppm)	13125	8704.78	11494.6	12132.2	11307	13397.5	11400.3	12576.6	12716.8	11571.6	13276.9	10901.7	11693.7	12119.8	11376.2	9885.77	10090	9770.93	8486.45	9737.34	9989.35	11263.7	9910.9
Ce4+/Ce3+	111.931	33.6046	77.1252	59.1121	50.6394	72.3983	45.3513	16.3634	24.7475	63.4755	45.5301	76.6419	65.2892	25.8001	48.7536	16.0792	25.3095	49.8592	41.0898	27.2441	65.1304	46.1992	65.6332
Eu/Eu*	0.217015	0.497844	0.0754364	0.161467	0.202461	0.241221	0.0598024	0.18823	0.269231	0.16045	0.15876	0.181474	0.427314	0.0476923	0.329034	0.431141	0.259059	0.197872	0.0466151	0.0810234	0.0868536	0.175965	0.0385161
Th/U	0.815723	0.880177	0.495451	0.67588	0.690309	0.70912	0.224722	0.287414	0.741648	0.419809	0.199557	0.786989	0.86867	0.410521	0.806485	0.805249	1.08996	0.501522	0.23262	0.815017	0.26494	0.659729	0.484684
Zr/Hf	43.2668	54.913	43.6101	41.1008	46.7201	38.3558	43.5433	39.3808	42.3638	44.1924	37.4461	47.1175	44.4243	37.7561	43.9675	50.0922	42.7191	51.3439	58.2734	49.9382	45.9093	40.0814	43.9548

## Sheet: S3
Table S3. Summary of in situ zircon Hf isotopic data for the representative sample EP-18-02 of the Epo granite
Spot.no	Age(Ma)	176Hf/177Hf	2SE	176Lu/177Hf	2SE	176Yb/177Hf	2SE	176Hf/177Hfi	εHf(t)	1SE	TDM1(Ma)	TDM2(Ma)
EP-18-02
EP-18-2-1	408	0.282303	3.7e-05	8.53e-05	2.64639e-05	0.026319	0.000776055	0.282302	-7.98971	1.295	1307.76	1884.51
EP-18-2-2	406	0.282296	2.3e-05	0.001428	6.55397e-06	0.047155	0.000667355	0.282285	-8.64367	0.805	1364.54	1924.04
EP-18-2-3	412	0.282326	2.5e-05	0.001203	1.07429e-05	0.03768	0.00109785	0.282317	-7.3919	0.875	1314.26	1850.08
EP-18-2-4	408	0.282279	2.1e-05	0.001575	1.98125e-05	0.053114	0.000751431	0.282267	-9.24236	0.735	1394.02	1963.26
EP-18-2-5	412	0.282372	1.9e-05	0.000662	1.20791e-05	0.021434	0.000244752	0.282367	-5.61587	0.665	1231.88	1738.15
EP-18-2-6	412	0.282377	2.2e-05	0.000666	7.60268e-06	0.021077	0.000295257	0.282372	-5.43999	0.77	1225.07	1727.05
EP-18-2-7	421	0.282343	2.1e-05	0.001035	1.18887e-05	0.032953	0.000580048	0.282335	-6.54921	0.735	1284.63	1804.18
EP-18-2-8	420	0.282281	2e-05	0.000629	3.8589e-06	0.020885	0.000333344	0.282276	-8.65229	0.7	1356.78	1935.75
EP-18-2-9	429	0.282311	2.1e-05	0.000567	2.02049e-05	0.018651	0.00024048	0.282306	-7.39725	0.735	1313.15	1863.18
EP-18-2-10	411	0.282352	2.3e-05	0.000833	7.50427e-06	0.027322	0.000423104	0.282346	-6.39231	0.805	1265.28	1786.32
EP-18-2-11	417	0.282313	2e-05	0.00061	1.53146e-05	0.019378	0.000230473	0.282308	-7.5802	0.7	1311.86	1865.92
EP-18-2-12	412	0.282313	2e-05	0.001415	3.36379e-05	0.050961	0.000603777	0.282302	-7.82431	0.7	1340.06	1880.49
EP-18-2-13	411	0.282289	1.9e-05	0.00088	1.20459e-05	0.029198	0.000211047	0.282282	-8.61324	0.665	1354.61	1926.92
EP-18-2-14	416	0.282291	2.5e-05	0.00059	3.10865e-05	0.018603	0.000448138	0.282286	-8.3314	0.875	1341.58	1913.98
EP-18-2-15	415	0.282291	2.5e-05	0.00133	1.29902e-05	0.043035	0.000991098	0.282281	-8.68691	0.875	1368.02	1930.75
EP-18-2-16	417	0.282308	2.83333e-05	0.000905433	1.12811e-05	0.0370513	0.000312268	0.282301	-7.84886	0.991667	1328.58	1882.03
EP-18-2-17	416	0.282326	2e-05	0.0011185	5.64831e-05	0.037274	0.000918757	0.282317	-7.32166	0.7	1312.02	1848.05
EP-18-2-18	411	0.282357	2.15e-05	0.0008505	3.89699e-06	0.027015	0.000416284	0.28235	-6.08933	0.7525	1258.89	1772
EP-18-2-19	426	0.282242	2.2e-05	0.0007	2.07527e-05	0.02335	0.000386101	0.282237	-10.1401	0.77	1413.29	2026.01
EP-18-2-20	410	0.282313	2e-05	0.0010125	9.24067e-06	0.0351695	0.00169852	0.282305	-7.82165	0.7	1325.81	1876.33
EP-18-2-21	412	0.2823	1.64839e-05	0.00219184	1.3669e-05	0.036737	0.000101594	0.282282	-8.30753	0.576936	1387.91	1918.86
EP-18-2-22	411	0.282311	2.4e-05	0.00136876	1.75719e-05	0.0424175	0.000657819	0.2823	-8.01102	0.84	1341.23	1887.45
EP-18-2-23	414	0.282303	1.78619e-05	0.00299572	1.60051e-05	0.0321263	0.000286366	0.282279	-8.67293	0.625166	1414.59	1932.26

## Sheet: S4
Table S4. Biotite major-element compositions of the Epo granite
Spot no.	1	2	3	4	5	6	7	8	9	10
SiO2	35.56	35.98	36.17	36.81	36.18	35.14	36.15	36.56	35.63	35.81
TiO2	2.13	2.59	2.86	2.33	2.94	2.46	3.1	2.13	2.87	2.32
Al2O3	17.95	17.377	17.79	16.71	17.54	18.08	16.84	16.95	16.78	17.32
FeOT	24.95	23.081	23.88	24.02	23.13	25.65	23.76	23.49	24.75	23.32
MnO	0.27	0.23	0.16	0.15	0.16	0.41	0.14	0.21	0.18	0.12
MgO	6.43	7.19	6.61	6.95	7.79	5.52	7.1	7.3	7.56	7.84
CaO	0.05	0.03	0.04	0.03	0.05	0.07	0.04	0.08	0.05	0.08
Na2O	0.08	0.07	0.06	0.06	0.07	0.08	0.07	0.14	0.09	0.19
K2O	9.23	9.33	9.26	9.34	9.44	9.16	9.55	9.74	9.29	9.55
Total	96.65	95.878	96.83	96.4	97.3	96.57	96.75	96.6	97.2	96.55
Si	5.3386	5.40166	5.43018	5.52626	5.43168	5.27555	5.42718	5.48873	5.34911	5.37613
Ti	0.240512	0.292454	0.322941	0.263096	0.331975	0.277775	0.350041	0.240512	0.324071	0.261966
Al	3.17585	3.07447	3.14754	2.95646	3.10331	3.19885	2.97946	2.99893	2.96885	3.06439
Fe3+	0.48	0.46	0.48	0.5	0.44	0.48	0.48	0.42	0.44	0.42
Fe2+	2.69565	2.48176	2.53501	2.53803	2.45573	2.80471	2.5311	2.56963	2.70036	2.53933
Mn	0.0343296	0.0292437	0.0203434	0.019072	0.0203434	0.0521301	0.0178005	0.0267008	0.0228864	0.0152576
Mg	1.43914	1.60924	1.47942	1.55552	1.74352	1.23546	1.58909	1.63386	1.69205	1.75472
Ca	0.00804188	0.00482513	0.00643351	0.00482513	0.00804188	0.0112586	0.00643351	0.012867	0.00804188	0.012867
Na	0.0232844	0.0203738	0.0174633	0.0174633	0.0203738	0.0232844	0.0203738	0.0407476	0.0261949	0.0553003
K	1.76757	1.78672	1.77331	1.78864	1.80779	1.75416	1.82885	1.86524	1.77906	1.82885
Total	15.203	15.1607	15.2127	15.1694	15.3628	15.1132	15.2303	15.2972	15.3106	15.3288
Fe3+/Fe2+	0.178065	0.182566	0.187129	0.195254	0.179999	0.169248	0.18598	0.160048	0.16073	0.169329
FeOT/(FeOT+MgO)	0.795092	0.762479	0.783208	0.775589	0.74806	0.822907	0.769929	0.76291	0.766017	0.748395

## Sheet: S5
Table S5. Whole-rock major (wt.%) and trace element (ppm) compositions of the Epo granite
Sample	EP-19-02	EP-19-04	EP-18-01	EP-18-02	EP-18-03	XGep-1*	XGep-2*	XGep-3*	XGep-5*	EP-2a*	EP-4*	EP-7*	EP-9*	EP-10*	JX16*
SiO2	69.51	71.4	73.17	66.78	75.08	79.7	72.62	71.3	71.09	66.64	69.89	71	69.8	71	72.92
TiO2	0.539	0.428	0.36	0.533	0.226	0.46	0.4	0.39	0.35	0.44	0.47	0.38	0.45	0.42	0.43
Al2O3	13.43	13.05	12.88	14.4	12.22	8.79	13.54	14.09	14.78	16.37	13.97	14.35	14.45	14.4	12.65
Fe2O3T	3.88	3.09	2.99	3.61	1.34	2.65	2.72	2.5	2.59	3.16	3.1	2.68	3.13	2.83	3.43
MnO	0.065	0.049	0.03	0.058	0.013	0.05	0.05	0.08	0.07	0.05	0.06	0.05	0.05	0.04	0.06
MgO	1	0.82	0.67	0.83	0.44	0.81	0.96	0.53	0.77	0.74	0.88	0.48	0.6	0.48	0.63
CaO	1.72	1.45	0.98	1.94	0.27	0.35	0.42	0.58	0.66	1.66	1.33	1.04	1.54	0.47	1.05
Na2O	3.03	2.73	2.4	2.69	1.64	0.55	2.35	2.62	2.77	4.04	3.22	2.98	2.98	2.59	2.34
K2O	3.54	4.73	5.27	5.56	5.62	3.73	5.53	5.25	4.83	4.81	4.56	5.66	5.5	5.95	4.14
P2O5	0.243	0.201	0.16	0.24	0.143	0.12	0.16	0.18	0.18	0.2	0.2	0.18	0.2	0.11	0.16
LOI	2.17	2	1.61	2.4	2.18	1.54	1.16	1.35	1.56	1.68	2.06	0.61	0.61	1.14	1.52
Total	99.127	99.948	100.52	99.041	99.172	98.75	99.91	98.87	99.65	99.79	99.74	99.41	99.31	99.43	99.33
Na2O+K2O	6.57	7.46	7.67	8.25	7.26	4.28	7.88	7.87	7.6	8.85	7.78	8.64	8.48	8.54	6.48
(Na2O+K2O)/Al	0.489203	0.571648	0.595497	0.572917	0.594108	0.486917	0.581979	0.558552	0.514208	0.540623	0.556908	0.602091	0.586851	0.593056	0.512253
K2O/Na2O	1.16832	1.7326	2.19583	2.06691	3.42683	6.78182	2.35319	2.00382	1.74368	1.19059	1.41615	1.89933	1.84564	2.2973	1.76923
A/CNK	1.12301	1.06401	1.1247	1.02914	1.31566	1.57251	1.27354	1.27355	1.3436	1.09944	1.10278	1.10909	1.05662	1.24423	1.2336
A/NK	1.52162	1.35601	1.33238	1.37685	1.38921	1.77494	1.37228	1.408	1.50845	1.37959	1.36352	1.29931	1.32927	1.34362	1.51642
FeOT/MgO	3.88	3.76829	4.46269	4.3494	3.04545	3.2716	2.83333	4.71698	3.36364	4.27027	3.52273	5.58333	5.21667	5.89583	5.44444
TiO2/MgO	0.539	0.521951	0.537313	0.642169	0.513636	0.567901	0.416667	0.735849	0.454545	0.594595	0.534091	0.791667	0.75	0.875	0.68254
FeOT/(FeOT+MgO)	0.795082	0.790281	0.81694	0.813063	0.752809	0.765896	0.73913	0.825083	0.770833	0.810256	0.778894	0.848101	0.839142	0.854985	0.844828
Mg#	34.0136	34.6723	30.9469	31.4991	39.6396	37.9391	41.3793	29.7753	37.2881	31.8966	36.214	26.3736	27.7136	25.3298	26.8657
molar Al2O3/(MgO+FeOT)	1.66901	2.01747	2.16677	1.99152	4.04591	1.5104	2.14875	2.87953	2.62398	2.57242	2.10529	2.85819	2.4228	2.75168	1.95649
molar CaO/(MgO+FeOT)	0.389336	0.408297	0.300286	0.488692	0.162825	0.109542	0.121403	0.215899	0.213423	0.47513	0.365073	0.377298	0.470309	0.163586	0.295793
Al2O3/TiO2	24.9165	30.4907	35.7778	27.0169	54.0708	19.1087	33.85	36.1282	42.2286	37.2045	29.7234	37.7632	32.1111	34.2857	29.4186
CaO/Na2O	0.567657	0.531136	0.408333	0.72119	0.164634	0.636364	0.178723	0.221374	0.238267	0.410891	0.413043	0.348993	0.516779	0.181467	0.448718
A	0.0288437	0.0153938	0.028002	0.00799516	0.0574873	0.0627493	0.0570242	0.059342	0.0741117	0.0290317	0.0255293	0.0276751	0.015183	0.0554231	0.0469702
B	0.0856264	0.0687667	0.0627778	0.0775514	0.0324361	0.0628056	0.0667778	0.0528472	0.0595972	0.0678889	0.0709306	0.0539722	0.0640972	0.0565556	0.0687639
La	66.929	53.93	42.485	61	36.1	25.1	62.3	57.6	-	59.87	33.62	59.55	64.82	56.76	57.11
Ce	135.452	109.621	81.35	137.058	84.2	50	124.46	43.86	-	112.7	60.94	119.4	127.9	112.7	119.34
Pr	15.5623	12.6467	9.495	15.8664	5.67424	5.56	11.81	3.33	-	13.43	7.28	13.78	14.64	12.68	12.98
Nd	58.2168	46.5599	35.59	59.4268	26.2	21.1	50.74	13.95	-	50.08	28.31	50.8	54.49	46.68	46.84
Sm	10.2043	8.20029	7.4	10.6131	4.05006	4.18	9.88	2.83	-	8.62	5.73	9.42	9.87	8.32	9.49
Eu	1.14521	1.0689	1.16	1.30295	0.546952	1.05	1.13	0.28	-	1.46	1.16	1.13	1.43	1.32	0.91
Gd	8.20024	6.65233	5.83	8.46902	3.23765	4.07	8.06	2.7	-	7.23	5.86	8.37	8.99	7.51	8.21
Tb	1.2987	1.05516	0.925	1.37651	0.50672	0.71	1.21	0.58	-	1.14	0.88	1.19	1.31	1.06	1.36
Dy	7.76199	6.42379	4.635	8.33803	2.856	3.7	7.42	3.99	-	5.57	5.49	6.13	7.16	5.58	8.45
Ho	1.54939	1.28251	0.94	1.67859	0.523138	0.76	1.49	0.88	-	1.12	1.15	1.11	1.4	1.03	1.66
Er	4.66172	3.38751	2.75	4.76092	1.41271	2.28	4.28	2.9	-	3.22	3.05	3.29	4.32	3.11	4.89
Tm	0.535437	0.405691	0.37	0.521388	0.20138	0.32	0.64	0.49	-	0.42	0.32	0.46	0.63	0.44	0.72
Yb	2.59434	2.14448	1.6	2.77662	1.20957	1.93	4.09	2.88	-	2.89	1.44	2.99	4.01	2.88	4.79
Lu	0.343251	0.281869	0.31	0.374712	0.164033	0.29	0.8	0.43	-	0.39	0.22	0.45	0.6	0.43	0.67
REE	314.455	253.66	194.595	313.563	166.882	121.05	288.31	96.66	-	268.14	155.45	278.07	301.57	260.5	277.42
TMnz	865.548	833.908	824.157	843.76	842.852	827.229	882.9	818.16	-	850.247	875.55	858.864	848.411	867.55	876.005
Eu/Eu*	0.370454	0.428748	0.521269	0.406311	0.446655	0.768306	0.375403	0.305201	-	0.550082	0.606366	0.3809	0.455494	0.500607	0.307708
TE 1-3	1.01483	1.0252	0.986142	1.06864	0.98274	0.99963	0.94084	1.06537	-	0.980298	0.941983	1.01753	1.00459	1.01328	1.04993
(La/Yb)N	18.5049	18.0388	19.0465	15.7585	21.408	9.32861	10.9261	4.37353	-	14.8598	16.747	14.286	11.5949	14.1368	8.55219
La/Yb	25.7981	25.1483	26.5531	21.9692	29.8453	13.0052	15.2323	6.09722	-	20.7163	23.3472	19.9164	16.1646	19.7083	11.9228
Li	27.4057	24.5929	37.7374	30.3686	30.6457	-	40.1	36	-	33.1	65.7	75.87	69.8	63.8	47.27
Be	3.05776	2.18938	2.9225	2.74826	1.69776	-	-	-	-	3.88	1.97	3.06	2.12	2.94	1.97
Sc	8.14465	6.23528	6.34	8.32989	3.5	-	-	-	-	6.34	6.94	4.98	6.05	5.42	6.52
Ti	3234	2568	2160	3198	1356	2760	2400	2340	2100	2640	2820	2280	2700	2520	2580
V	32.5141	23.452	21.2	31.1255	10.5		28	10	-	29.19	38.8	20.8	25.8	22.7	23.02
Cr	10.79	14.79	13.91	16.04	9.3	-	-	-	-	21.45	27.9	23.29	29.86	24.27	7.58
Ni	17.42	25	15.79	20.6	18.8		6.8	3.1	-	5.37	23.3	3.07	5.12	4.98	3.53
Zn	67.5403	48.4155	51	61.4854	31.9789	-	-	-	-	107	56.7	59.5	59.1	64.9	74.9
Ga	26.4237	22.5256	20.1	26.2126	14.7953	-	-	-	-	21.67	19.61	21.21	20.96	20.62	21.63
Rb	158.123	202.031	241	268.168	256	192	250	250	-	215.4	170	263	220	274	234.19
Sr	160.813	108.946	93	153.815	80	39.4	233	87	-	220.8	144.6	117	137	120	95.09
Y	47.753	38.0114	25.18	49.7275	23.9449	20.6	40.84	25.44	-	29.76	28.87	29.3	36.75	26.48	50.32
Zr	246.824	200.542	184	251.395	113	-	173	96	-	264.9	296.9	181	260	209	233.15
Nb	22.225	18.3223	13.005	22.874	15.7796	6.98	15.3	11.5	-	19.03	25.56	29.22	30.26	29.54	29.65
Ba	480.089	626.06	583	601.761	481.112	-	573	388	-	696	650	766	794	906	613.89
Hf	6.75707	5.48546	6.11	7.05769	3.39691	-	4	4	-	7.09	8.27	5.47	7.45	6.07	6.56
Ta	2.48052	2.34087	2.21	2.74201	2.40962	-	2.5	2.98	-	2.61	2.75	2.63	2.28	2.57	2.16
Pb	22.1569	26.2292	29.1	33.8588	30.5331	-	-	-	-	-	-	-	-	-	26.77
Th	30.7932	26.2285	25.66	31.6675	22.8163	-	-	-	-	24.66	15.42	36.38	32.75	30.51	26.62
U	2.96949	3.4266	4.45	4.6776	4.76454	-	-	-	-	2.45	2.66	3.17	1.99	3.25	4.11
Tzr	832.246	809.251	808.5	820.031	782.868	-	-	-	-	828.957	847.406	802.192	828.64	827.442	840.971
Zr+Nb+Ce+Y	452.254	366.496	303.535	461.055	236.925	-	353.6	176.8	-	426.39	412.27	358.92	454.91	377.72	432.46
10000*Ga/Al	3.71642	3.26041	2.94772	3.43838	2.28696	-	-	-	-	2.50044	2.65148	2.79187	2.73987	2.70478	3.22978
Th/Sc	3.78079	4.20646	4.04732	3.80167	6.51895	-	-	-	-	3.88959	2.2219	7.30522	5.41322	5.62915	4.08282
La/Sm	6.5589	6.5766	5.74122	5.74763	8.91346	6.00478	6.30567	6.20495	-	6.94548	5.86736	6.32166	6.56738	6.82212	6.01791
Th/Ta	12.414	11.2046	11.6109	11.549	9.46886	-	-	-	-	9.44828	5.60727	13.8327	14.364	11.8716	12.3241
La/Ta	26.9819	23.0384	19.224	22.2465	14.9816	-	24.92	19.3289	-	22.9387	12.2255	22.6426	28.4298	22.0856	26.4398
La/Sm	6.5589	6.5766	5.74122	5.74763	8.91346	6.00478	6.30567	6.20495	-	6.94548	5.86736	6.32166	6.56738	6.82212	6.01791
Nb/Y	0.465416	0.482021	0.516481	0.459986	0.658998	0.338835	0.374633	0.452044	-	0.639449	0.885348	0.99727	0.823401	1.11556	0.589229
V/Sc	3.99208	3.76118	3.34385	3.7366	3	-	-	-	-	4.6041	5.59078	4.17671	4.26446	4.18819	3.53067
Y+Nb	69.978	56.3336	38.185	72.6015	39.7245	27.58	56.14	36.94	-	48.79	54.43	58.52	67.01	56.02	79.97
Sr/Y	3.36761	2.86615	4.66599	3.09317	3.34101	1.91262	5.70519	3.41981	-	7.41935	5.00866	3.99317	3.72789	4.53172	1.88971
Th/Nb	1.38552	1.43151	0.647924	1.38443	1.44594	-	-	-	-	1.29585	0.603286	1.24504	1.08229	1.03284	0.897808
La/Nb	3.01143	2.94341	3.37104	2.66679	2.28776	3.59599	4.0719	1.52696	-	3.14609	1.31534	2.03799	2.1421	1.92146	1.92614
Y/Nb	2.14861	2.0746	1.93618	2.17398	1.51746	2.95129	2.66928	2.21217	-	1.56385	1.1295	1.00274	1.21447	0.896412	1.69713
Y/Yb	18.4066	17.7252	10.4856	17.9094	19.7962	10.6736	9.98533	8.83333	-	10.2976	20.0486	9.79933	9.16459	9.19444	10.5052
Rb/Sr	0.983268	1.85441	2.5914	1.74344	3.2	4.8731	1.07296	2.87356	-	0.975543	1.17566	2.24786	1.60584	2.28333	2.46282
Rb/Nd	2.7161	4.33915	6.70032	4.51258	9.77099	9.09953	4.92708	17.9211	-	4.30112	6.00495	5.17717	4.03744	5.86975	4.99979
Rb/Nb	7.11463	11.0265	19.4131	11.7237	16.2235	27.5072	16.3399	21.7391	-	11.319	6.65102	9.00068	7.27032	9.27556	7.89848
Rb/Zr	0.64063	1.00743	0.72	1.06672	2.26549	-	1.44509	2.60417	-	0.813137	0.572583	1.45304	0.846154	1.311	1.00446
Th/U	10.3699	7.65437	5.76629	6.77003	4.78877	-	-	-	-	10.0653	5.79699	11.4763	16.4573	9.38769	6.47689
Nb/Ta	8.95983	7.82711	5.88462	8.34205	6.5486	-	6.12	3.85906	-	7.29119	9.29455	11.1103	13.2719	11.4942	13.7269
Sm/Nd	0.175281	0.176123	0.185114	0.178591	0.154582	0.198104	0.194718	0.202867	-	0.172125	0.202402	0.185433	0.181134	0.178235	0.202605
Nb/U	7.48445	5.34707	2.92247	4.89011	3.31188	-	-	-	-	7.76735	9.60902	9.21767	15.206	9.08923	7.21411
Ce/Pb	6.11332	4.17936	2.79553	4.04793	2.75766	-	-	-	-	-	-	-	-	-	4.45798
Notes:
The data for the asterisked sample are from Guo et al. (2014), Feng et al. (2014) and Cui (2014).
References
Guo, N.X., Zhang, Z., Chen, Z.Y., Chen, Y.C., Hou, K.J., Wang, S.Y., 2014. Chronology, geochemistry and geological significance of Epo granite intrusion, Southern Jiangxi. Rock and Mineral Analysis 33(4), 589-597 (in Chinese).
Feng, S.J., Zhao, K.D., Ling, H.F., Chen, P.R., Chen, W.F., Sun, T., Jiang, S.Y., Pu, W., 2014. Geochronology, elemental and Nd-Hf isotopic geochemistry of Devonian A-type granites in central Jiangxi, South China: Constraints on petrogenesis and post-collisional extension of the Wuyi-Yunkai orogen. Lithos, 206-207, 1-18.
Cui, Y.Y., 2014. Geochronology, geochemistry and petrogenesis of the granitoids in the Sanming-Ganzhou Area, South China. A dissertation submitted to China University of Geosciences for master degree.

## Sheet: S6
Table S6. Whole-rock Sr-Nd isotope compositions of representative samples from the Epo granite
Sample	SiO2 (wt.%)	Rb(ppm)	Sr(ppm)	87Rb/86Sr	87Sr/86Sr	1SE	87Sr/86Sri	Sm(ppm)	Nd(ppm)	147Sm/144Nd	143Nd/144Nd	1SE	143Nd/144Nd(i)	εNd(0)	εNd(t)	TDM2(Ma)
EP-19-02	69.51	158.123	160.813	2.88348	0.731528	4e-06	0.714527	10.2043	58.2168	0.106554	0.511995	7.69964e-06	0.511706	-12.3795	-7.65675	1837.56
EP-19-04	71.4	202.031	108.946	5.43814	0.739696	7e-06	0.707632	8.20029	46.5599	0.107066	0.511993	8.46106e-06	0.511702	-12.4343	-7.73873	1842.01
EP-18-01	73.17	241	93	4.12802	0.736996	7e-06	0.712656	7.4	35.59	0.133934	0.512028	6e-06	0.511665	-11.7494	-8.47561	1786.46
EP-18-02	66.78	268.168	153.815	5.11273	0.737012	5e-06	0.706867	10.6131	59.4268	0.108566	0.511994	4e-06	0.5117	-12.4023	-7.78612	1839.41
EP-18-03	75.08	256	80	5.29156	0.741154	6e-06	0.709955	4.05006	26.2	0.119255	0.511949	6e-06	0.511626	-13.2844	-8.9	1910.93
EP-2a*	66.64	215.4	220.8	2.86083	0.73221	5e-06	0.715342	8.62	50.08	0.117144	0.51199	3e-06	0.511672	-12.4846	-8.32268	1846.09
EP-4*	69.89	170	144.6	3.44767	0.734463	8e-06	0.714135	5.73	28.31	0.123041	0.512041	7e-06	0.511707	-11.4898	-7.64	1765.39
Notes:
The data of EP-2a* and EP-4* are from Feng et al. (2014)
Reference
Feng, S.J., Zhao, K.D., Ling, H.F., Chen, P.R., Chen, W.F., Sun, T., Jiang, S.Y., Pu, W., 2014. Geochronology, elemental and Nd-Hf isotopic geochemistry of Devonian A-type granites in central Jiangxi, South China: Constraints on petrogenesis and post-collisional extension of the Wuyi-Yunkai orogen. Lithos, 206-207, 1-18.
